# Supplementary material for: Longitudinal Wave Power as a Proxy for Coastal Change Detection
Source: Copernicus journal article supplement (doi:10.5194/egusphere-2025-5773), 2025-12-22

## **Supplementary Material for**

### **Longitudinal Wave Power as a Proxy for Coastal Change Detection**

Marta Aragón<sup>1</sup>, Óscar Ferreira<sup>2</sup>, Alejandro López-Ruiz<sup>3</sup>, Miguel Ortega-Sánchez<sup>1</sup>

<sup>1</sup>Andalusian Institute for Earth System Research, University of Granada, Granada, 18006, Spain.

<sup>2</sup>Centro de Investigação Marinha e Ambiental (CIMA/ARNET), Universidade do Algarve, Faro, 8005-139, Portugal.

<sup>3</sup>Departamento de Ingeniería Aeroespacial y Mecánica de Fluidos, Universidad de Sevilla, Seville, 41092, Spain.

*Correspondence to:* Marta Aragón (maragon@ugr.es)

#### **Contents of this file**

Tables S1 to S3 and Figures S1 to S10.

#### **Introduction**

This file includes: Table A1, which provides information related to Van Rijn's formulation; Table S2, which details the Delft3D-SWAN model settings; Table S3, which outlines POT combinations for morphological and climatic event; and, Figures S1 and S10 of are the equivalent of figures 4 and 5 of the paper that shows the comparison between Climatic Events of LWP and Hs with the Morpho Events, for 1990-91 (S1 and S2), 1999-2000 (S3 and S4), 2000-2001 (S5 and S6), 2010-11 (S7 and S8) and 2019-20 (S9 and S10)

## Information related to the Van Rijn formulation

Table S1. Parameters used for the sediment formulation. [-] indicated non-dimensional and [log] indicated a logical value.

| Parameter     | Value    | Definition                                                            |
|---------------|----------|-----------------------------------------------------------------------|
| <b>IopSus</b> | 0 [log]  | Suspended particle diameter determination                             |
| <b>Pangle</b> | 51 [deg] | Phase lead for bed shear stress                                       |
| <b>Fpco</b>   | 1 [-]    | Phase lag effect in wave-induced suspended transport                  |
| <b>Subiw</b>  | 51 [-]   | Wave period subdivision                                               |
| <b>EpsPar</b> | 0 [log]  | Van Rijn's parabolic mixing coefficient                               |
| <b>GamTcr</b> | 1.5 [-]  | Power of the grain size ratio in the critical shear stress expression |
| <b>SalMax</b> | 0 [-]    | Salinity for saline settling velocity                                 |
| <b>BetaM</b>  | 0 [-]    | Exponent used for effect of mud fraction on critical shear stress     |
| <b>Wform</b>  | 1 [log]  | Wave form used                                                        |

## Model set-up.

**Table S2. Overview of the Delft3D and SWAN model parameters.**

| Parameter      | Value       | Units                            | Description                                              |
|----------------|-------------|----------------------------------|----------------------------------------------------------|
| <b>General</b> |             |                                  |                                                          |
| Tstart         | 0           | min                              | Start time                                               |
| Tstop          | 525600      | min                              | Stop time                                                |
| Dt             | 0.1         | min                              | Timestep                                                 |
| Ag             | 9.81        | ms <sup>-2</sup>                 | Gravitational Acceleration                               |
| <b>Flow</b>    |             |                                  |                                                          |
| Rhow           | 1000        | kgm <sup>-3</sup>                | Water Density                                            |
| Tempw          | 15          | C                                | Water Temperature                                        |
| Salw           | 31          | ppt                              | Salinity                                                 |
| Rouwav         | FR84        |                                  | Bottom Stress formulation due to wave action             |
| Rhoa           | 1           | kgm <sup>-3</sup>                | Air Density                                              |
| Ccofu          | 65          | m <sup>0.5</sup> s <sup>-1</sup> | Chezy roughness u                                        |
| Ccofv          | 65          | m <sup>0.5</sup> s <sup>-1</sup> | Chezy roughness v                                        |
| Vicouv         | 2           |                                  | Uniform horizontal eddy viscosity                        |
| Dicouv         | 10          |                                  | Uniform vertical eddy diffusivity                        |
| Irov           | 0           |                                  | Wall roughness (slip condition)                          |
| Dryflc         | 0.05        | m                                | Threshold depth for drying and flooding                  |
| Tlfsmo         | 60          | s                                | Time interval to smooth hydrodynamic boundary conditions |
| North          | Neumann     |                                  | North boundary condition                                 |
| RettisNorth    | 0           | min                              | North Thatcher Harlemann return time                     |
| East           | water level | m                                | East boundary condition                                  |
| South          | Neumann     |                                  | South boundary condition                                 |
| RettisEast     | 0           | min                              | South Thatcher Harlemann return time                     |
| River          | discharge   | m <sup>3</sup> /s                | River boundary condition                                 |
| RettisRiver    | 0           | min                              | River Thatcher Harlemann return time                     |
| <b>Waves</b>   |             |                                  |                                                          |
| MinimumDepth   | 0.05        | m                                | Minimum depth                                            |
| GenModePhysics | 3           |                                  | Generation mode of physics                               |
| Breaking       | true        |                                  | Include wave breaking                                    |
| BreakAlpha     | 1           |                                  | Alpha coefficient for wave breaking                      |
| BreakGamma     | 0.73        |                                  | Gamma coefficient for wave breaking                      |
| BedFriction    | jonswap     |                                  | Bed friction type                                        |
| BedFricCoef    | 0.067       |                                  | Bed friction coefficient                                 |
| Diffraction    | false       |                                  | Include diffraction                                      |

| Parameter        | Value            | Units           | Description                                               |
|------------------|------------------|-----------------|-----------------------------------------------------------|
| WindGrowth       | false            |                 | Include wind growth                                       |
| WhiteCapping     | Komen            |                 | White capping formulation                                 |
| Quadruplts       | false            |                 | Include quadruplets                                       |
| Refraction       | true             |                 | Include refraction                                        |
| FreqShift        | true             |                 | Include frequency shifting in frequency space             |
| WaveForces       | Dissipation 3d   |                 | Method of wave force computation                          |
| FlowBedLevel 1   | 0                |                 | Use bed level from FLOW in WAVE domain but do not extend  |
| FlowWaterLevel 1 | 0                |                 | Use water level from FLOW and extend across WAVE domain   |
| FlowVelocity 1   | 0                |                 | Use water level from FLOW and extend across WAVE domain   |
| FlowBedLevel 2   | use / extend (2) |                 | Use bed level from FLOW and extend across WAVE domain     |
| FlowWaterLevel 2 | use / extend (2) |                 | Use water level from FLOW and extend across WAVE domain   |
| FlowVelocity 2   | use / extend (2) |                 | Use flow velocity from FLOW and extend across WAVE domain |
| DirSpace         | circle           |                 | Default directional space                                 |
| Ndir             | 36               |                 | Number of directional bins                                |
| FreqMin          | 0.05             | s <sup>-1</sup> | Minimum frequency                                         |
| FreqMax          | 1                | s <sup>-1</sup> | Maximum frequency                                         |
| Nfreq            | 24               |                 | Number of frequencies                                     |
| SpectrumSpec     | parametric       |                 | Spectrum type                                             |
| SpShapeType      | jonswap          |                 | Spectrum shape                                            |
| PeriodType       | peak             |                 | Wave period type                                          |
| DirSpreadType    | power            |                 | Directional spreading type                                |
| PeakEnhanceFac   | 3.3              |                 | Peak enhancement factor                                   |
| WaveHeight       | var              | m               | Wave height at boundaries                                 |
| PeriodType       | var              | s               | Wave period at boundaries                                 |
| Direction        | var              | deg             | Wave direction at boundaries                              |
| DirSpreading     | 4                | deg             | Directional spreading                                     |

### Morphology

|        |       |     |                                                                    |
|--------|-------|-----|--------------------------------------------------------------------|
| EpsPar | false |     | Vertical mixing distribution according to van Rijn                 |
| MorFac | 1     |     | Morphological scale factor                                         |
| MorStt | 720   | min | Spin-up interval from TStart to the start of morphological changes |
| Thresh | 0.05  | m   | Threshold sediment thickness for transport and erosion reduction   |
| MorUpd | true  |     | Update bathymetry during FLOW simulation                           |
| EqmBc  | true  |     | Equilibrium sand concentration profile at inflow boundaries        |
| DensIn | false |     | Include effect of sediment concentration on fluid density          |

| Parameter | Value | Units | Description                                                     |
|-----------|-------|-------|-----------------------------------------------------------------|
| AksFac    | 1     |       | van Rijn's reference height                                     |
| Rwave     | 2     |       | Wave related roughness. Van Rijn recommends range 1-3           |
| AlfaBs    | 1     |       | Streamwise bed gradient factor for bed load transport           |
| AlfaBn    | 1.5   |       | Transverse bed gradient factor for bed load transport           |
| Sus       | 1     |       | Multiplication factor for suspended sediment ref. concentration |
| Bed       | 1     |       | Multiplication factor for bed-load transport vector magnitude   |
| SusW      | 0.15  |       | Wave-related suspended sed. transport factor                    |
| BedW      | 0.15  |       | Wave-related bed-load sed. transport factor                     |
| SedThr    | 0.1   | m     | Minimum water depth for sediment computations                   |
| ThetSD    | 1     |       | Factor for erosion of adjacent dry cells                        |
| HMaxTH    | 1.5   | m     | Max depth for variable THETSD.                                  |
| FWFac     | 1     |       | Tuning parameter for wave streaming                             |

#### Sediment

|             |       |                   |                                                                       |
|-------------|-------|-------------------|-----------------------------------------------------------------------|
| Cref        | 1600  | kgm <sup>-3</sup> | CSoil Reference density for hindered settling calculations            |
| RhoSol      | 2650  | kg/m <sup>3</sup> | Specific density                                                      |
| SedDia      | 0.001 | m                 | Median sediment diameter (D50)                                        |
| CdryB       | 1600  | kg/m <sup>3</sup> | Dry bed density                                                       |
| IniSedThick | 10    | m                 | Initial sediment sand layer thickness at bed, updrift sediments       |
| FacDSS      | 1     |                   | FacDss * SedDia = Initial suspended sediment diameter.                |
| IopSus      | false |                   | Suspended particle diameter determination                             |
| Pangle      | 51    | deg               | Phase lead for bed shear stress                                       |
| Fpco        | 1     |                   | Phase lag effect in wave-induced suspended transport                  |
| Subiw       | 51    |                   | Wave period subdivision                                               |
| EpsPar      | false |                   | Van Rijn's parabolic mixing coefficient                               |
| GamTcr      | 1.5   |                   | Power of the grain size ratio in the critical shear stress expression |
| SalMax      | 0     |                   | Salinity for saline settling velocity                                 |
| BetaM       | 0     |                   | Exponent used for effect of mud fraction on critical shear stress     |
| Wform       | true  |                   | Wave form used                                                        |

POT combinations.

Table S3. POT combinations for the morphological and climatic events

| Combination number | Percentile | Independence criterion (days) | Minimum event duration (hours) |
|--------------------|------------|-------------------------------|--------------------------------|
| 1                  | 95         | 2                             | 6                              |
| 2                  | 95         | 2                             | 12                             |
| 3                  | 95         | 2                             | 18                             |
| 4                  | 95         | 2                             | 24                             |
| 5                  | 95         | 2                             | 48                             |
| 6                  | 95         | 3                             | 6                              |
| 7 (T-POT)          | 95         | 3                             | 12                             |
| 8                  | 95         | 3                             | 18                             |
| 9                  | 95         | 3                             | 24                             |
| 10                 | 95         | 3                             | 48                             |
| 11                 | 95         | 4                             | 6                              |
| 12                 | 95         | 4                             | 12                             |
| 13                 | 95         | 4                             | 18                             |
| 14                 | 95         | 4                             | 24                             |
| 15                 | 95         | 4                             | 48                             |
| 16                 | 96         | 2                             | 6                              |
| 17                 | 96         | 2                             | 12                             |
| 18                 | 96         | 2                             | 18                             |
| 19                 | 96         | 2                             | 24                             |
| 20                 | 96         | 2                             | 48                             |
| 21                 | 96         | 3                             | 6                              |
| 22                 | 96         | 3                             | 12                             |
| 23                 | 96         | 3                             | 18                             |
| 24                 | 96         | 3                             | 24                             |
| 25                 | 96         | 3                             | 48                             |

| Combination number | Percentile | Independence criterion (days) | Minimum event duration (hours) |
|--------------------|------------|-------------------------------|--------------------------------|
| 26                 | 96         | 4                             | 6                              |
| 27                 | 96         | 4                             | 12                             |
| 28                 | 96         | 4                             | 18                             |
| 29                 | 96         | 4                             | 24                             |
| 30                 | 96         | 4                             | 48                             |
| 31                 | 98         | 2                             | 6                              |
| 32                 | 98         | 2                             | 12                             |
| 33                 | 98         | 2                             | 18                             |
| 34                 | 98         | 2                             | 24                             |
| 35                 | 98         | 2                             | 48                             |
| 36                 | 98         | 3                             | 6                              |
| 37                 | 98         | 3                             | 12                             |
| 38                 | 98         | 3                             | 18                             |
| 39                 | 98         | 3                             | 24                             |
| 40                 | 98         | 3                             | 48                             |
| 41                 | 98         | 4                             | 6                              |
| 42                 | 98         | 4                             | 12                             |
| 43                 | 98         | 4                             | 18                             |
| 44                 | 98         | 4                             | 24                             |
| 45                 | 98         | 4                             | 48                             |

**Figure S1. Comparison between volume changes, in north (a) and south CV (b), LWP (c) and wave height (d) during the 1990-91 climate for ME90 (90<sup>th</sup> percentile for volume variation). In (c,d) the CE related to T-POT are marked in red dots.**

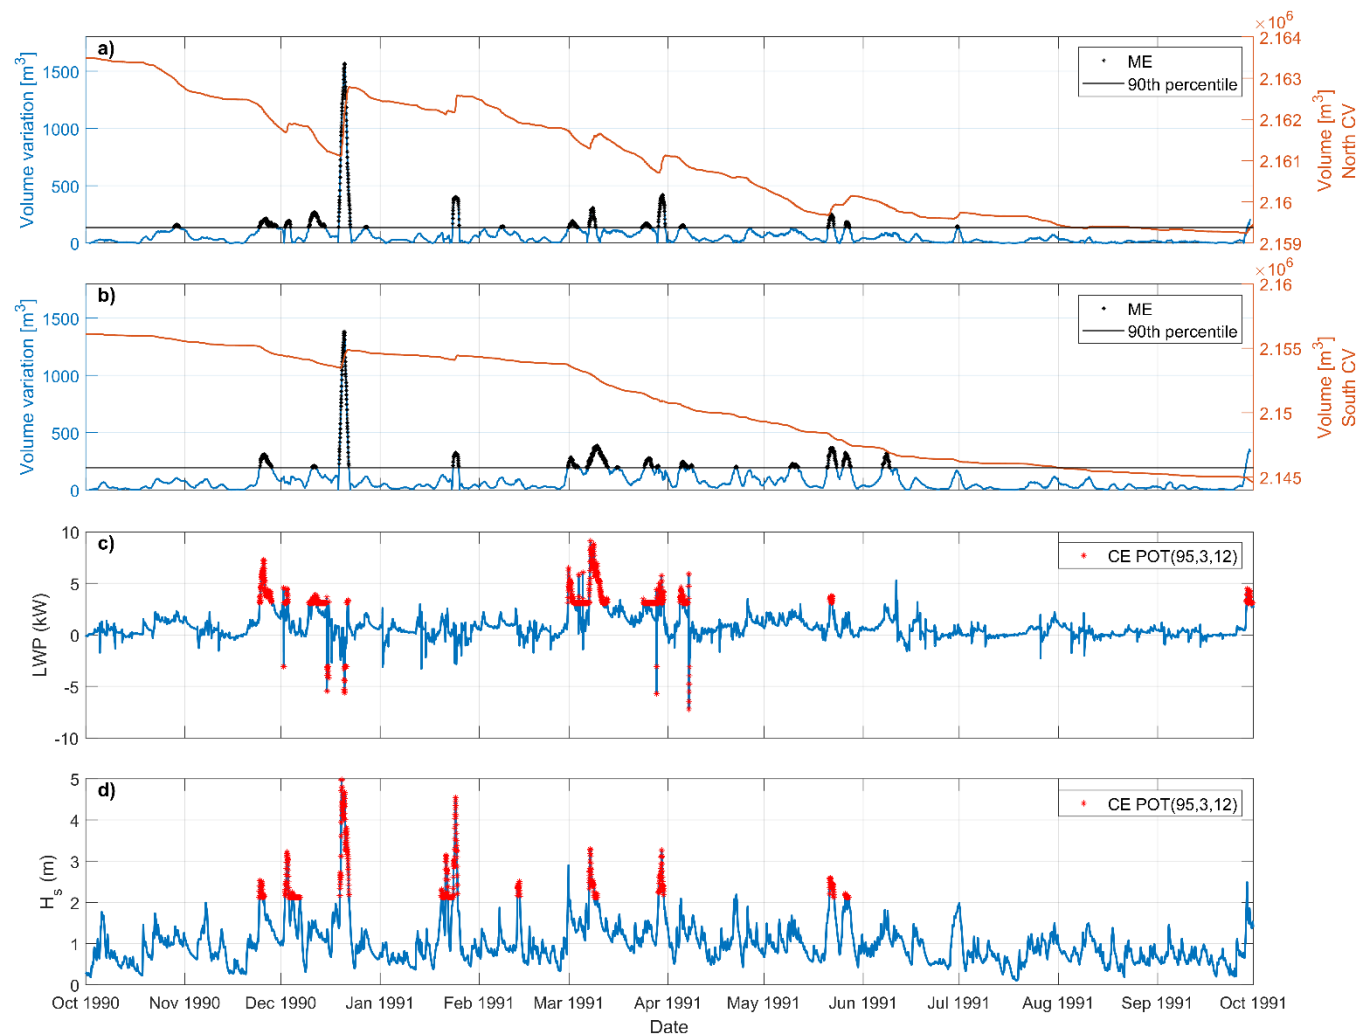

**Figure S2. Comparison between volume changes, in north (a) and south CV (b), LWP (c) and wave height (d) during the 1990-91 climate for ME95 (95<sup>th</sup> percentile for volume variation). In (c,d) the CE related to T-POT are marked in red dots.**

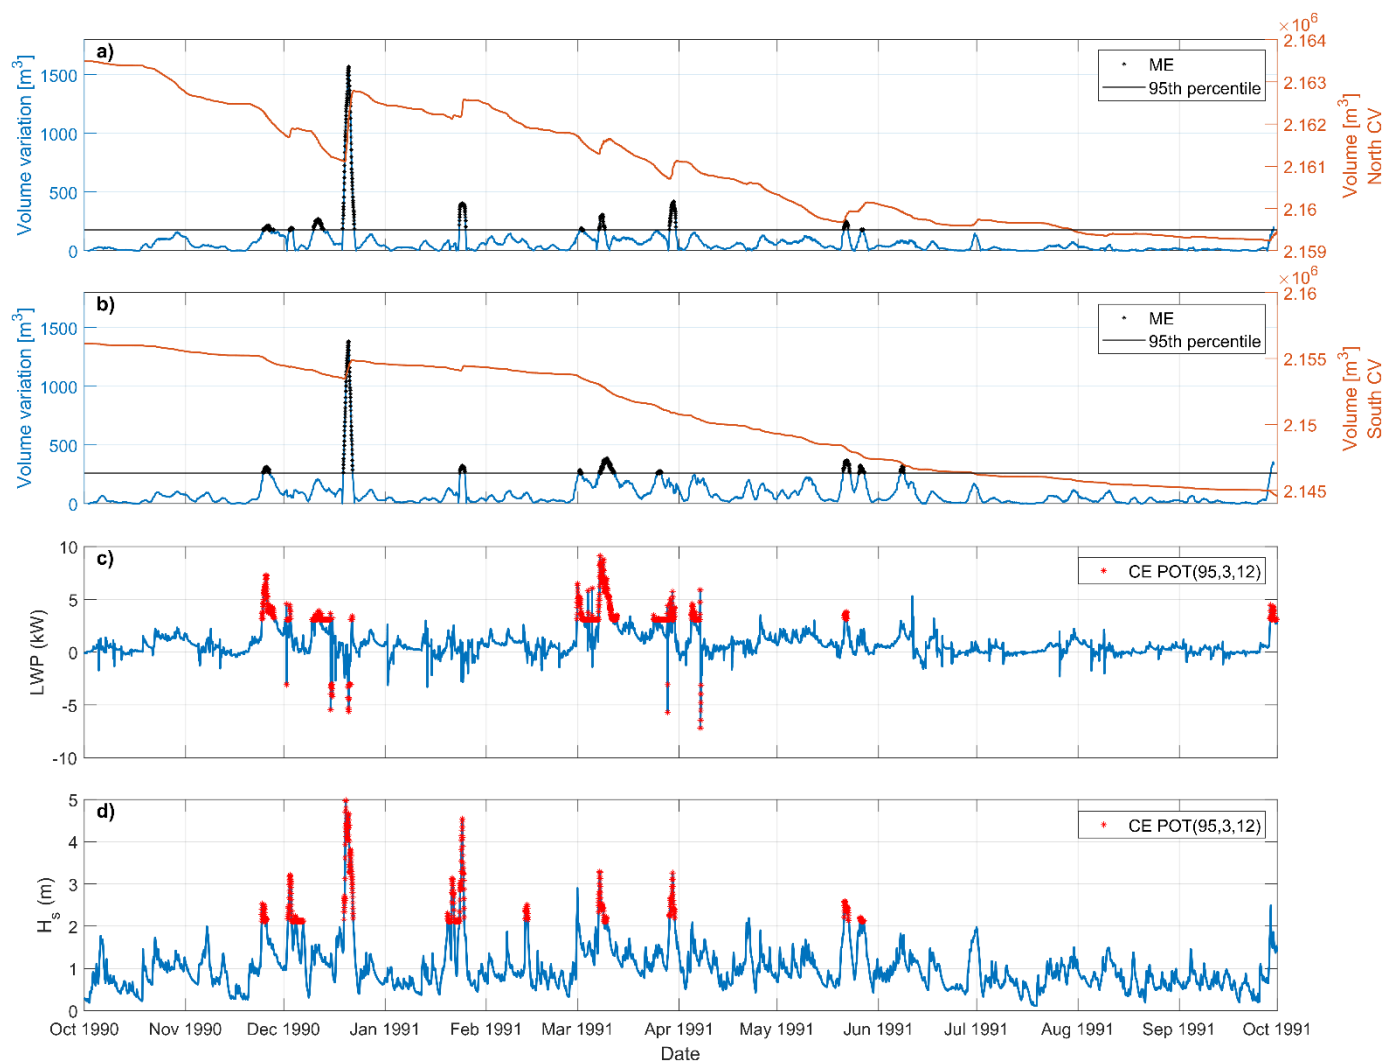

**Figure S3. Comparison between volume changes, in north (a) and south CV (b), LWP (c) and wave height (d) during the 1999-2000 climate for ME90 (90<sup>th</sup> percentile for volume variation). In (c,d) the CE related to T-POT are marked in red dots.**

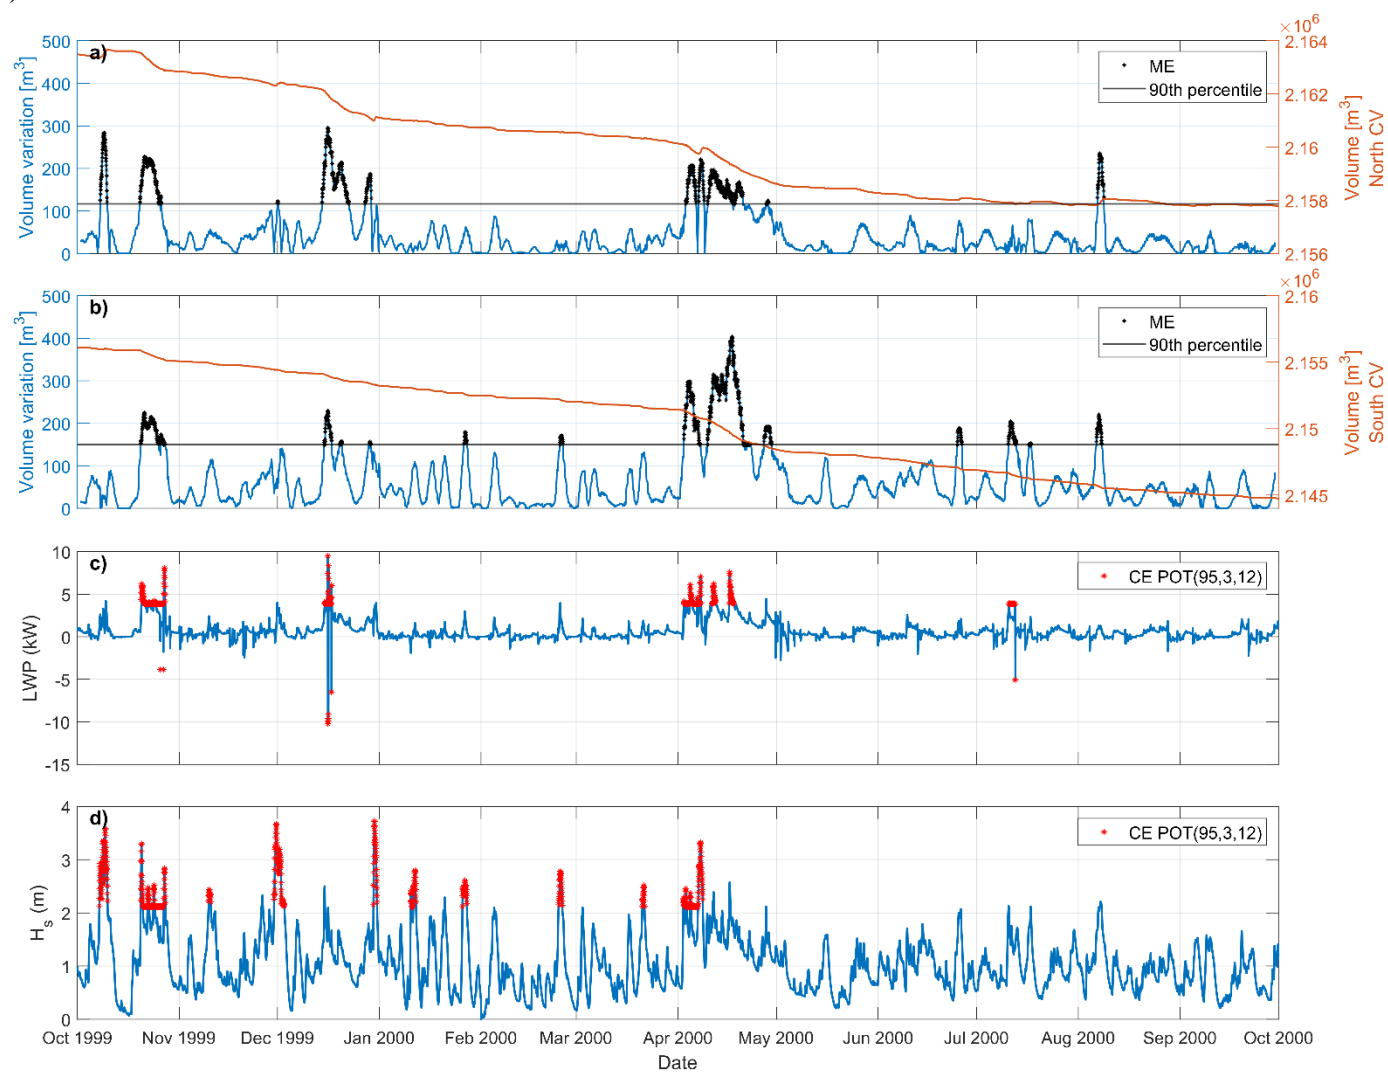



**Figure S4. Comparison between volume changes, in north (a) and south CV (b), LWP (c) and wave height (d) during the 1999-2000 climate for ME95 (95<sup>th</sup> percentile for volume variation). In (c,d) the CE related to T-POT are marked in red dots.**

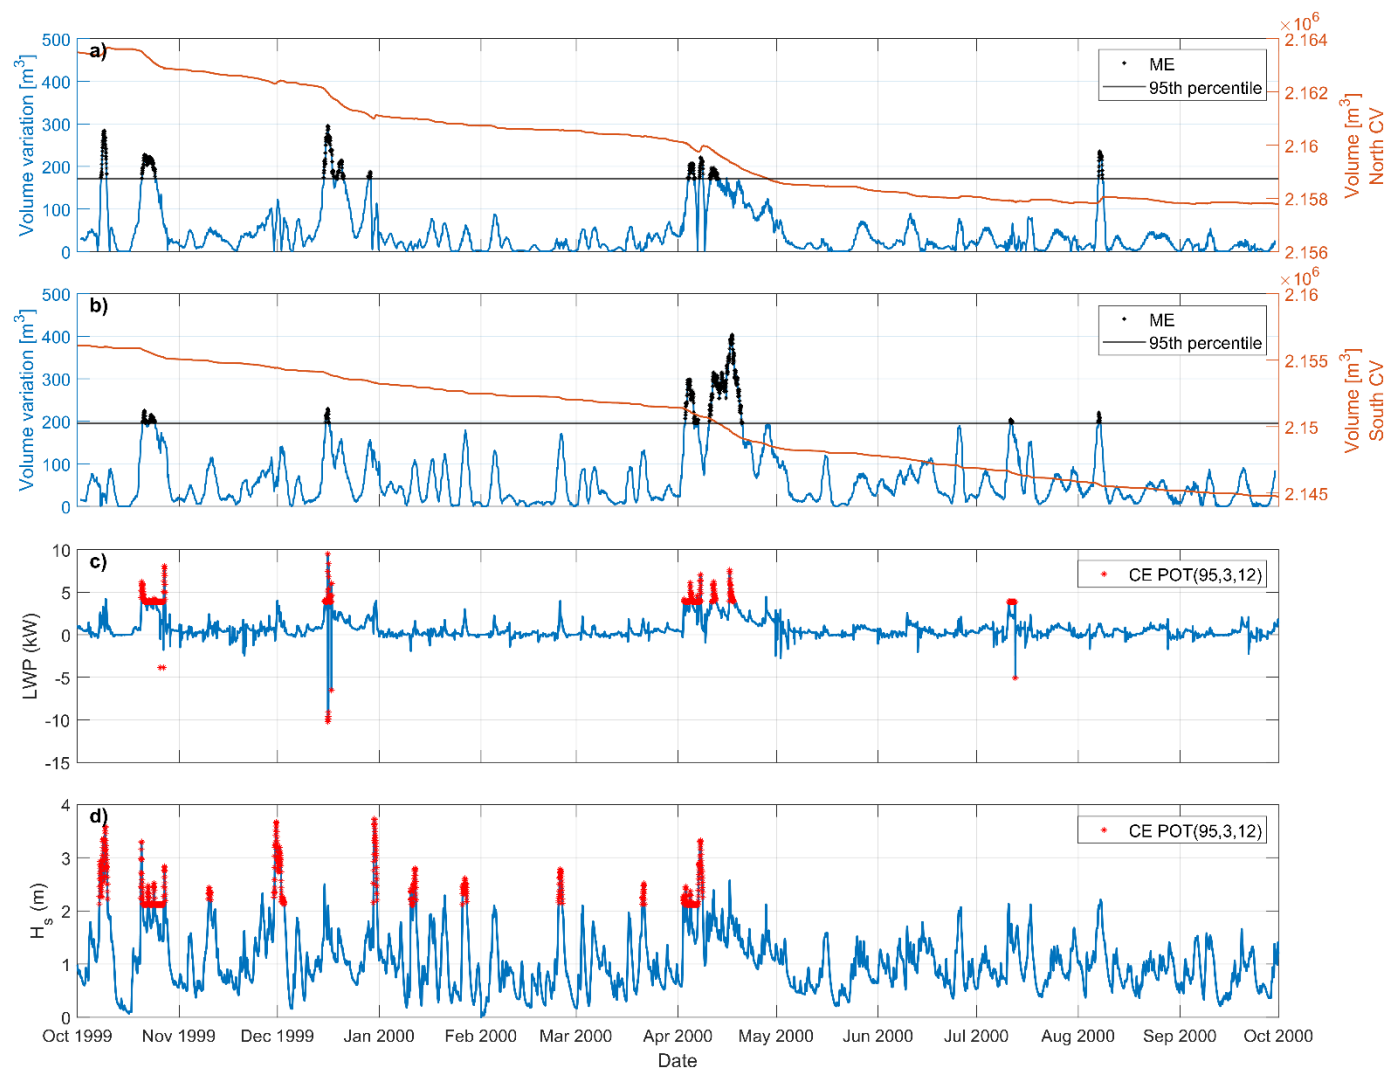

**Figure S5. Comparison between volume changes, in north (a) and south CV (b), LWP (c) and wave height (d) during the 2000-2001 climate for ME90 (90<sup>th</sup> percentile for volume variation). In (c,d) the CE related to T-POT are marked in red dots.**

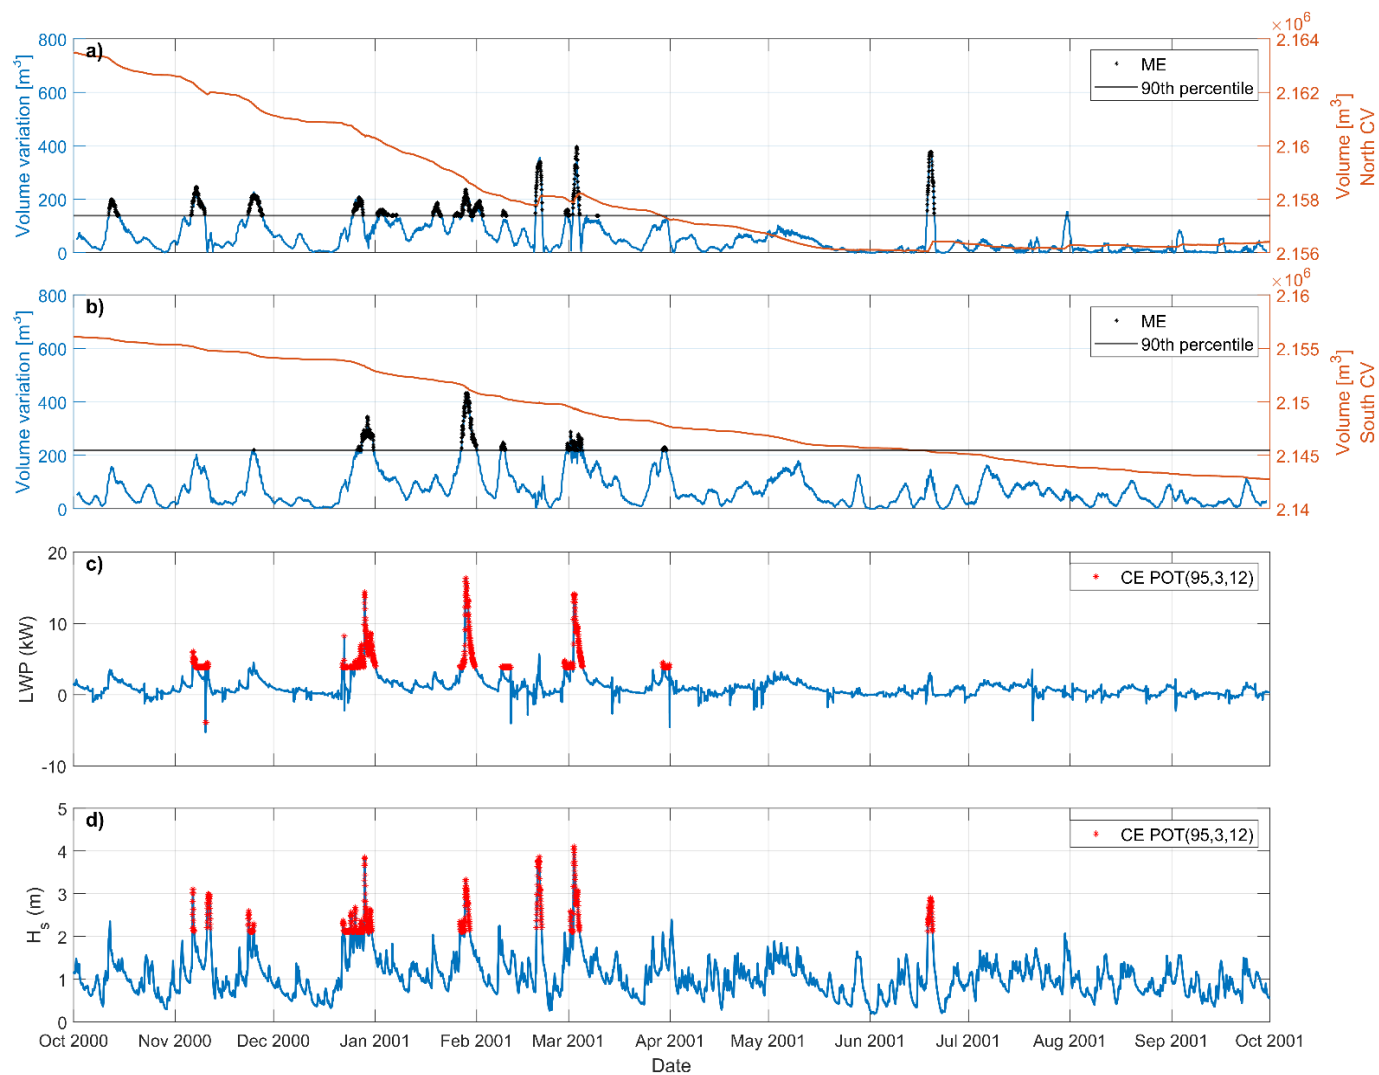

**Figure S6. Comparison between volume changes, in north (a) and south CV (b), LWP (c) and wave height (d) during the 2000-2001 climate for ME95 (95<sup>th</sup> percentile for volume variation). In (c,d) the CE related to T-POT are marked in red dots.**

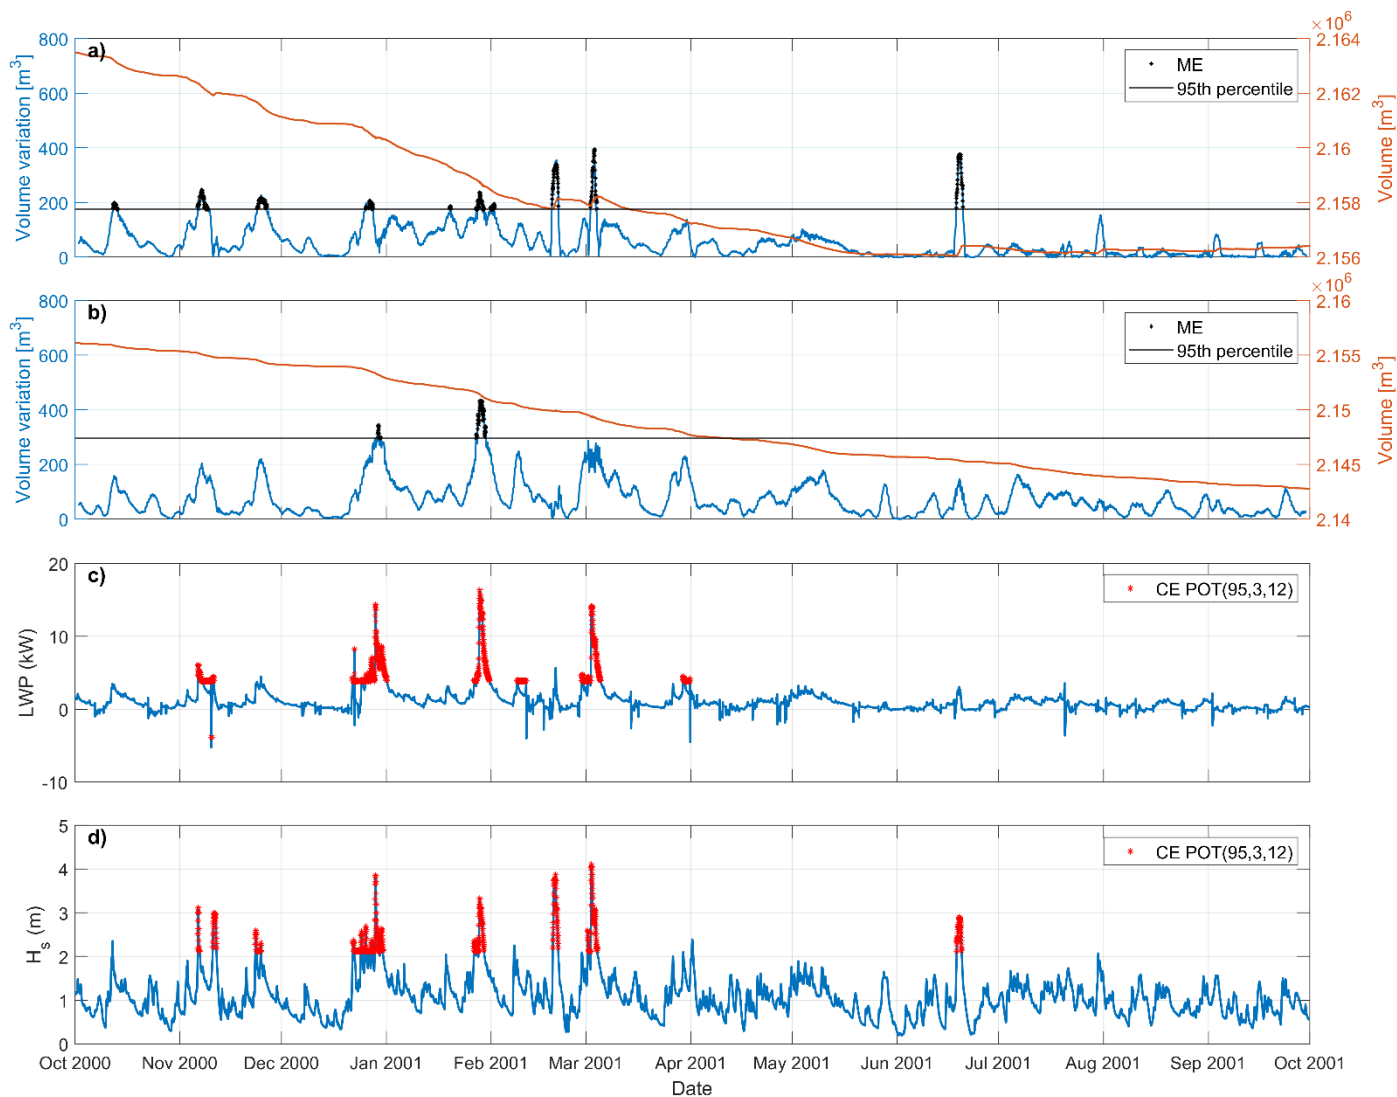

**Figure S7. Comparison between volume changes, in north (a) and south CV (b), LWP (c) and wave height (d) during the 2010-11 climate for ME90 (90<sup>th</sup> percentile for volume variation). In (c,d) the CE related to T-POT are marked in red dots.**

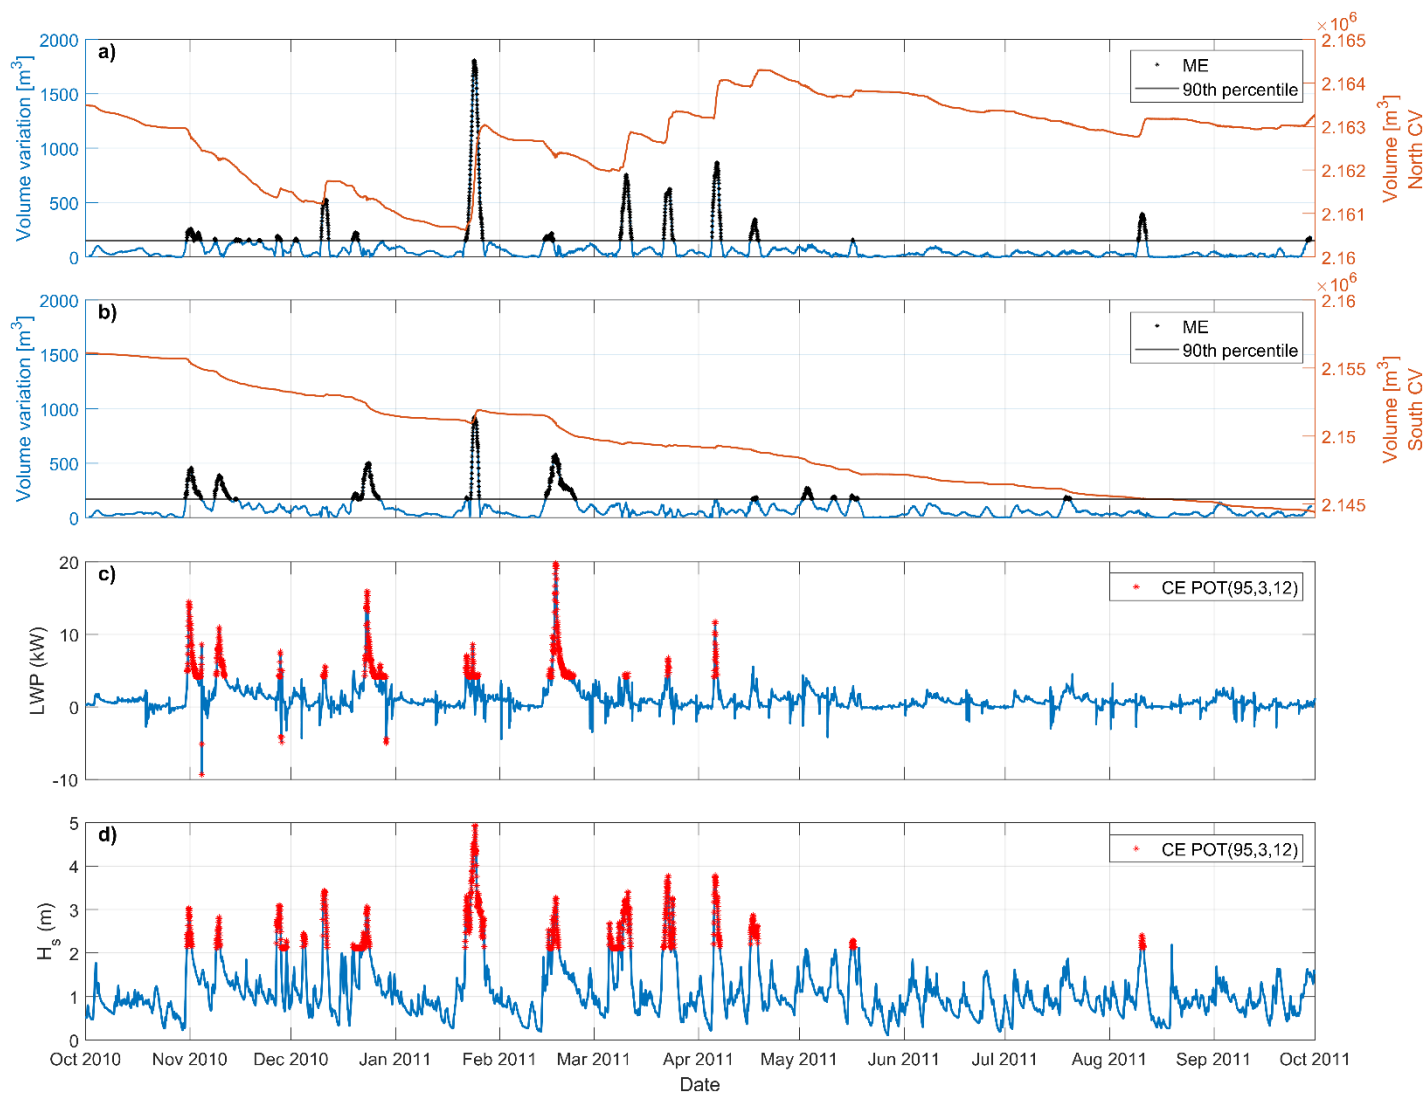

Figure S8. Comparison between volume changes, in north (a) and south CV (b), LWP (c) and wave height (d) during the 2010-11 climate for ME95 (95<sup>th</sup> percentile for volume variation). In (c,d) the CE related to T-POT are marked in red dots.

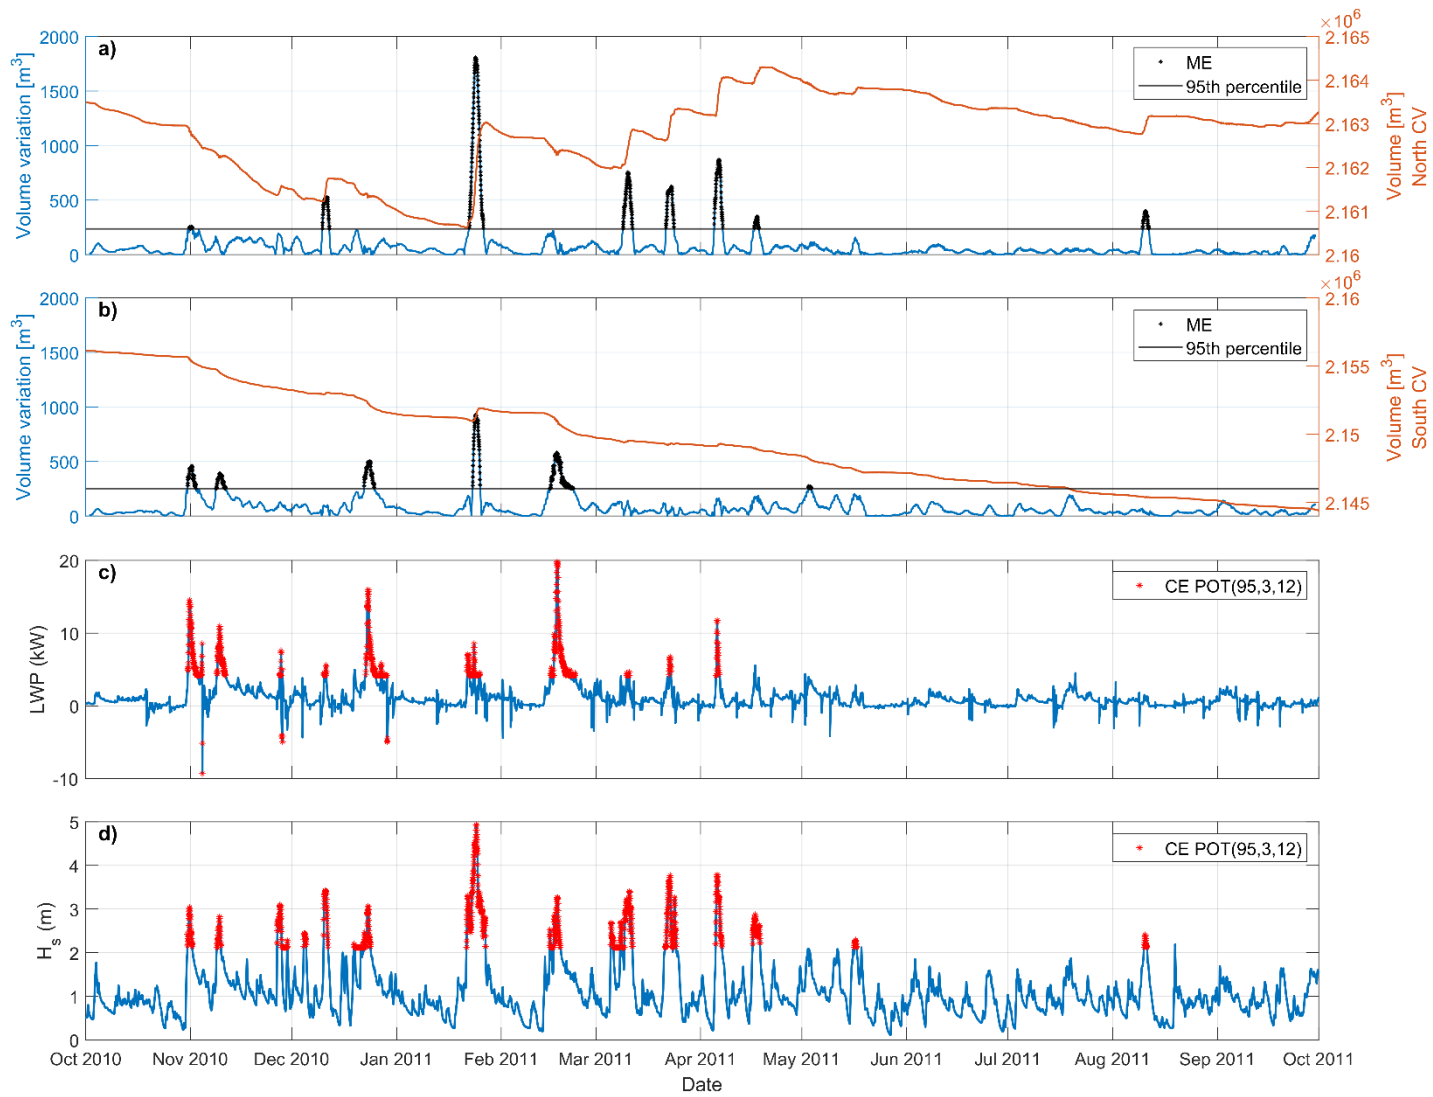

**Figure S9. Comparison between volume changes, in north (a) and south CV (b), LWP (c) and wave height (d) during the 2019-20 climate for ME90 (90<sup>th</sup> percentile for volume variation). In (c,d) the CE related to T-POT are marked in red dots.**

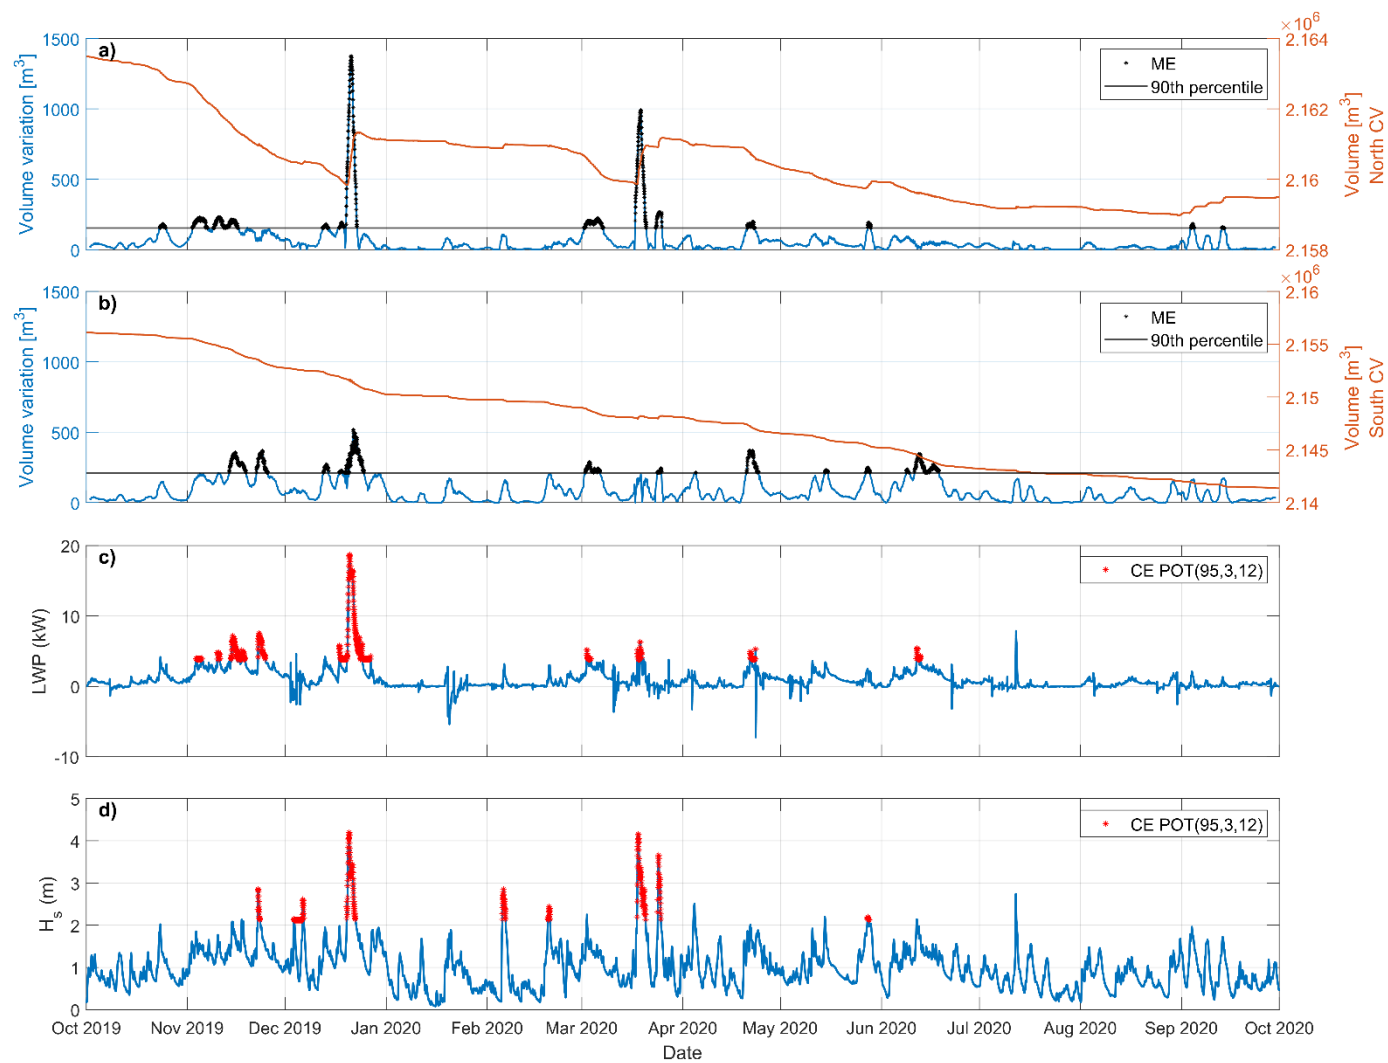

**Figure S10. Comparison between volume changes, in north (a) and south CV (b), LWP (c) and wave height (d) during the 2019-20 climate for ME95 (95<sup>th</sup> percentile for volume variation). In (c,d) the CE related to T-POT are marked in red dots.**

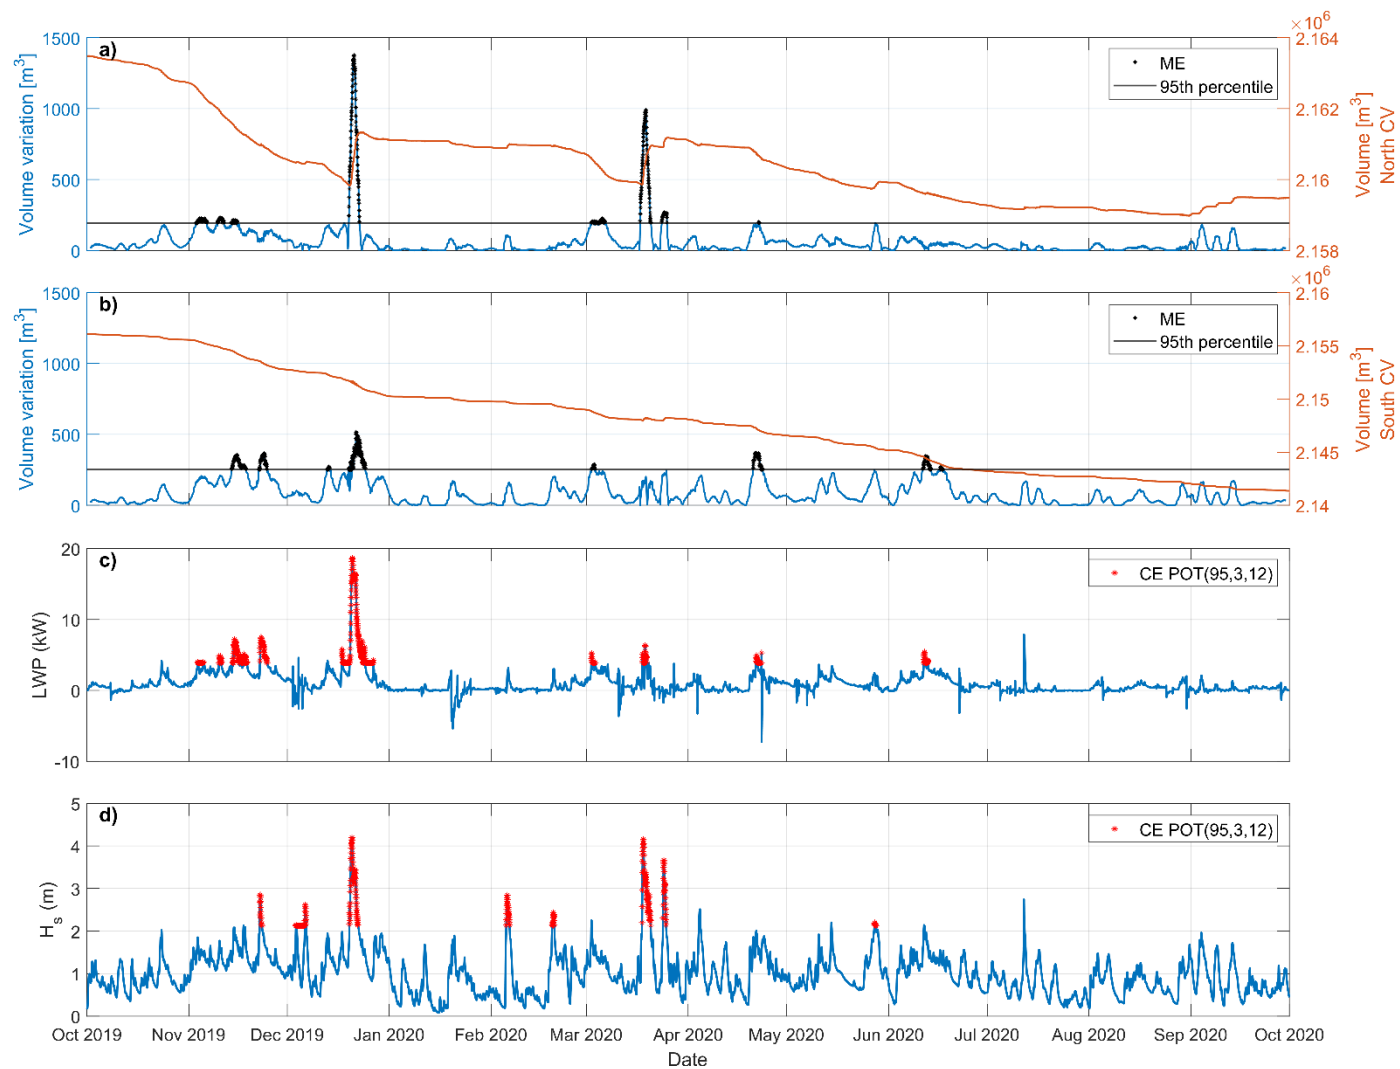

Supplement: Supplementary file 1 [file egusphere-2025-5773-supplement.pdf]
